# Supplementary material for: Thy1-ApoE4/C/EBPβ double transgenic mice act as a sporadic model with Alzheimer’s disease
Source: PubMed Central journal article supplement (PMC11449781; doi:10.1038/s41380-024-02565-x), 2024-04-24
Supplement: 41380_2024_2565_MOESM1_ESM.pdf [file 41380_2024_2565_MOESM1_ESM.pdf]

## **Supplementary Information for**

### **Thy1-ApoE4/C/EBP $\beta$ Double Transgenic Mice Act as a Sporadic Model with Alzheimer's Disease**

By

Zhengjiang Qian<sup>1</sup>, ZhiHao Wang<sup>2</sup>, Bowei Li<sup>3</sup>, Xin Meng<sup>1</sup>, Zhonghua Kuang<sup>4</sup>, Yanjiao

Li<sup>1</sup>, Yongfeng Yang<sup>4</sup> and Keqiang Ye<sup>1,\*</sup>

**This PDF file includes:**

Supplementary Fig. 1 to Fig. 8

# Supplementary Fig. 1

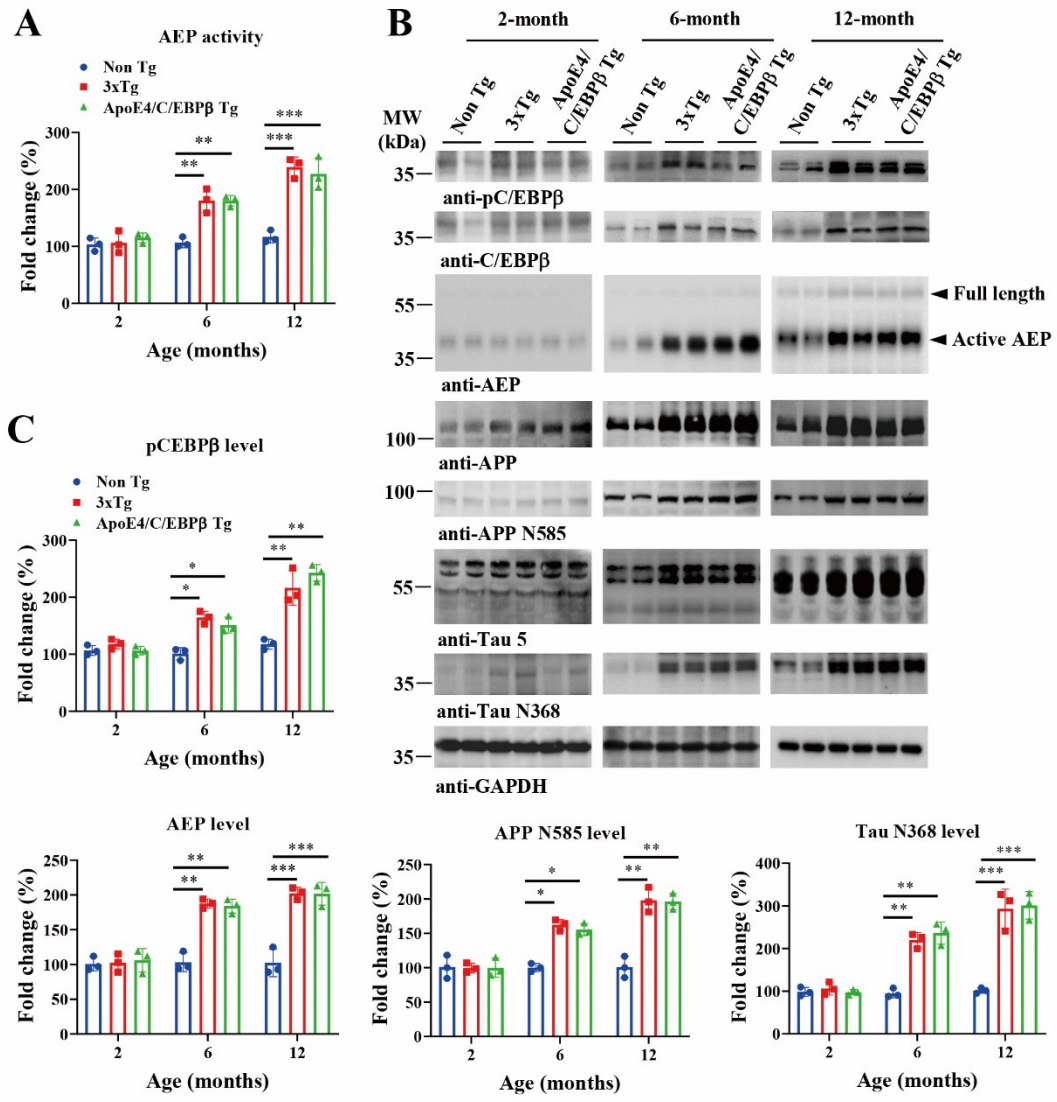

**Supplementary Fig. 1 C/EBP $\beta$ /AEP signaling activation in 3xTg and Thy1-ApoE4/C/EBP $\beta$  Tg mice**

A. AEP enzymatic activity in the brains of 3xTg and Thy1-ApoE4/C/EBP $\beta$  Tg mice at 2-, 6- and 12-month of age. (n = 3, \*\* $p$  < 0.01, \*\*\* $p$  < 0.001, compared with Non Tg).

B. Western blotting assays of C/EBP $\beta$ , AEP and its downstream targets in the brains of 3xTg and Thy1-ApoE4/C/EBP $\beta$  Tg mice at 2-, 6- and 12-month of age.

C. Relative quantification of protein expression in (B). (n = 3, \*\* $p$  < 0.01, \*\*\* $p$  < 0.001, compared with Non Tg).

## Supplementary Fig. 2

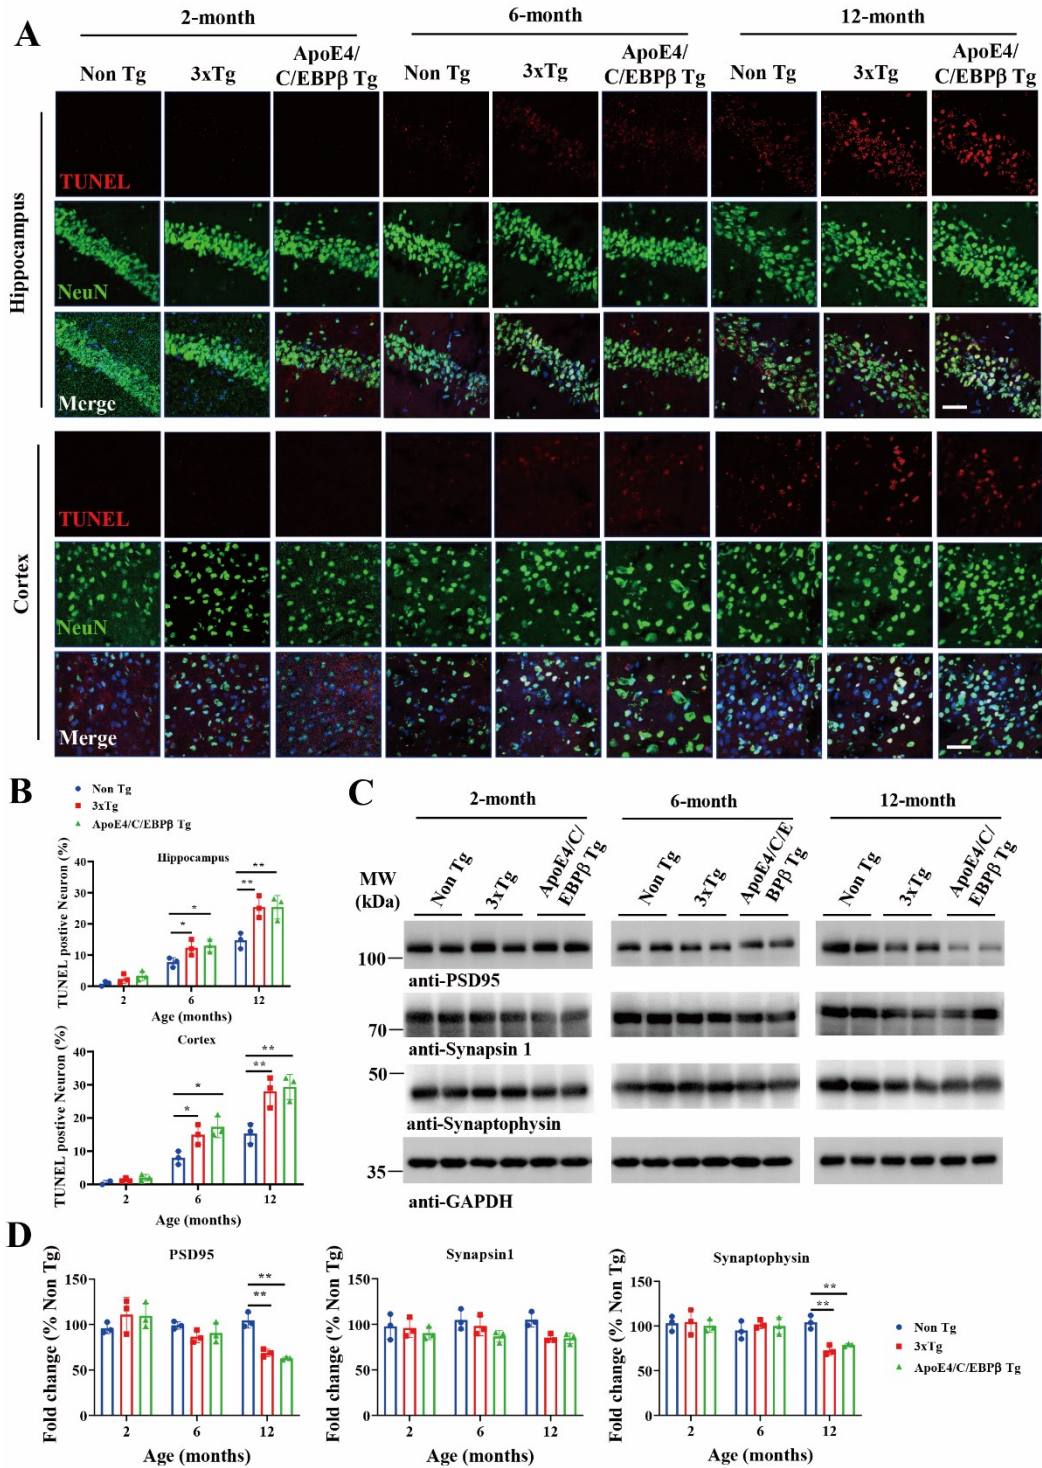

**Supplementary Fig. 2 Age-dependent neuronal loss in 3xTg and Thy1-ApoE4/C/EBP $\beta$  Tg mice.**

A. Immunostaining of NeuN and TUNEL in hippocampus (top panels) and cortex (bottom panels) of 3xTg and Thy1-ApoE4/C/EBP $\beta$  Tg mice at 2-, 6- and 12-month of age. Scale bar, 20  $\mu$ m.

B. Relative quantification of TUNEL positive NeuN in (A). (n = 6, \* $p$  < 0.05, \*\* $p$  < 0.01, compared with Non Tg).

C. Representative immunoblot images showing the expression of synaptic markers in 3xTg and Thy1-ApoE4/C/EBP $\beta$  Tg mice at 2-, 6- and 12-month of age.

D. Relative quantification of protein levels in (C). (n = 3, \*\*  $p$  < 0.01, compared with Non Tg).

Supplementary Fig. 3

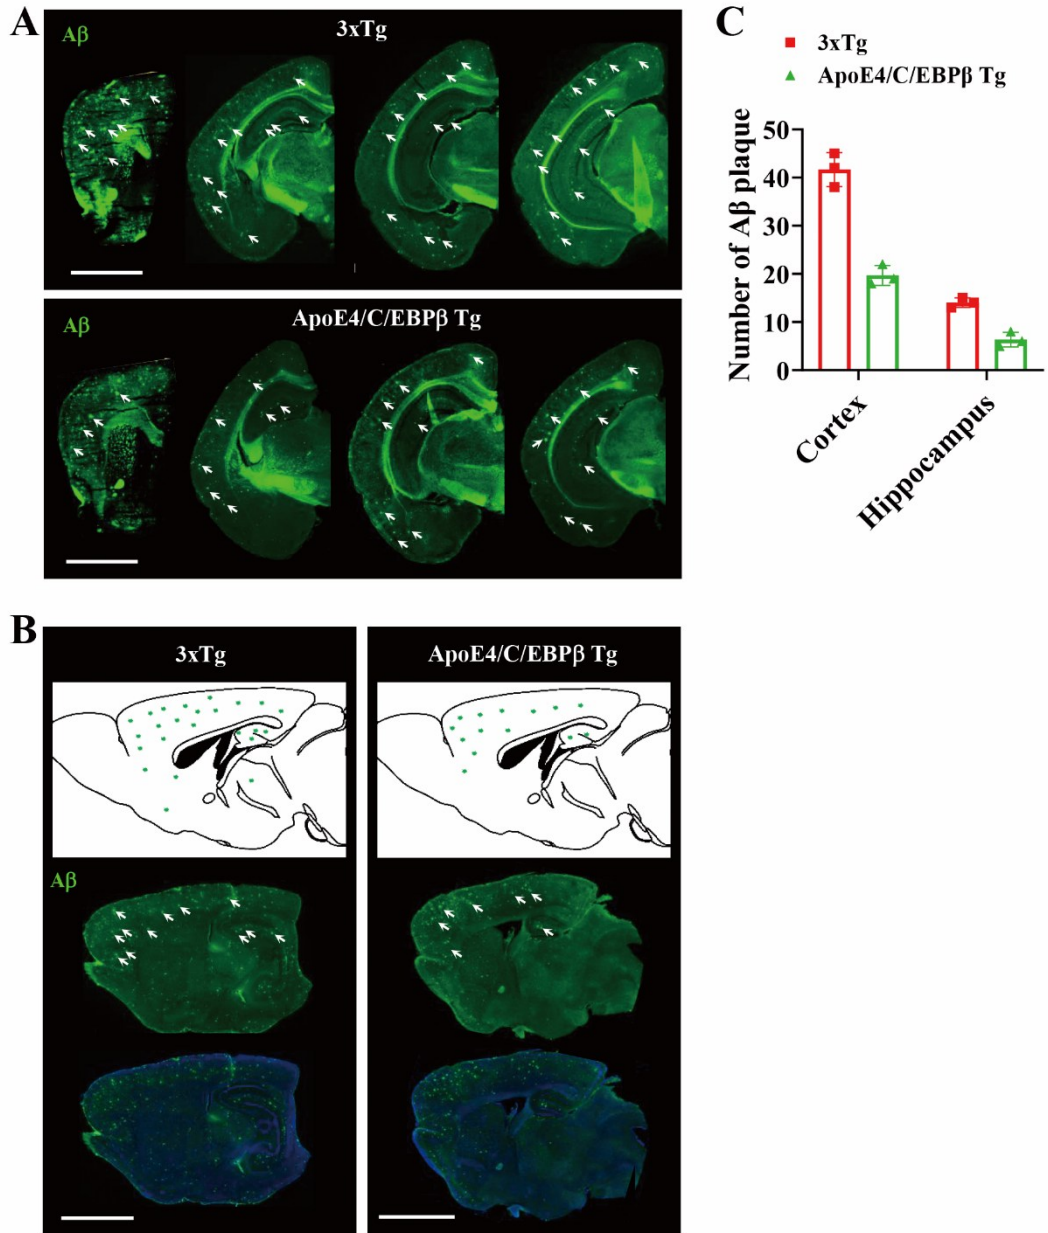

**Supplementary Fig. 3 Representative image of distribution of A $\beta$  pathology in 3xTg and Thy1-ApoE4/C/EBP $\beta$  Tg mice.**

A. Representative coronal section of A $\beta$  plaque in 3xTg and Thy1/ApoE3/C/EBP $\beta$  transgenic mice at the age of 12-month. Scale bar 500  $\mu$ m

B. Representative sagittal section of A $\beta$  plaque in 3xTg and Thy1/ApoE3/C/EBP $\beta$  transgenic mice at the age of 12-month. Scale bar 500  $\mu$ m.

C. Relative quantification of A $\beta$  plaque numbers in cortex and hippocampus of 3xTg and Thy1/ApoE3/C/EBP $\beta$  transgenic mice at the age of 12-month.

# Supplementary Fig. 4

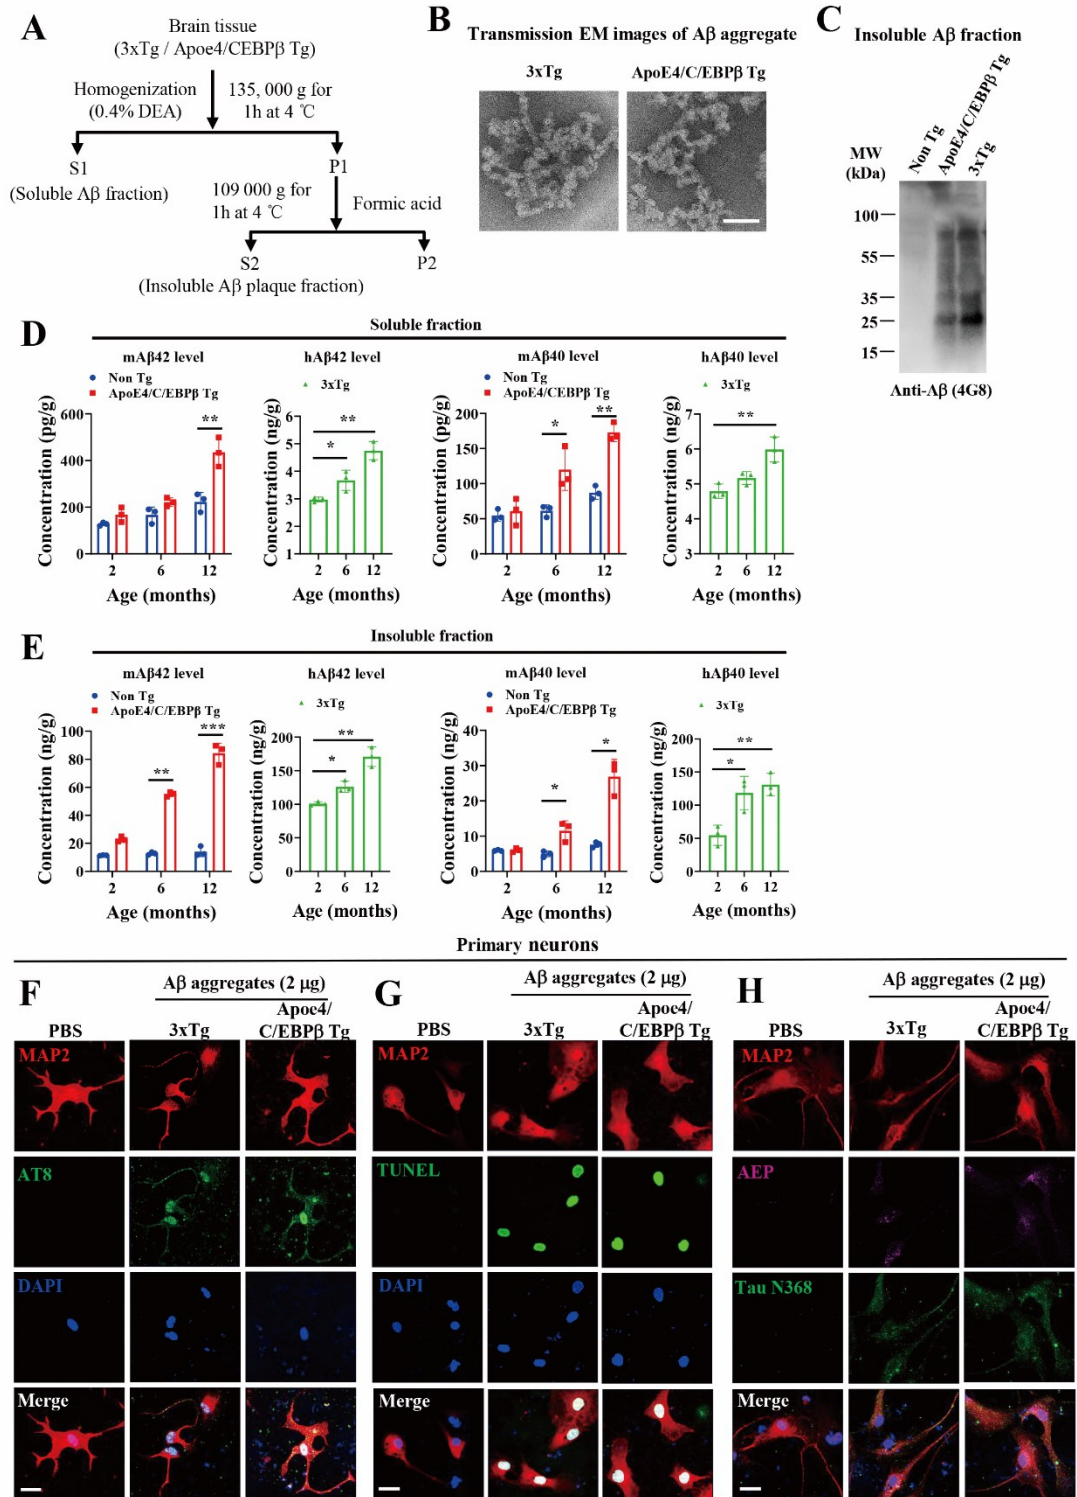



**Supplementary Fig. 4 Characterization of A $\beta$  aggregates in 3xTg and Thy1-ApoE4/C/EBP $\beta$  Tg mice.**

A. Diagram showing the isolation of soluble and insoluble A $\beta$  in the brain tissues of 3xTg and Thy1-ApoE4/C/EBP $\beta$  Tg mice.

B. Representative electron microscope images of insoluble A $\beta$  fraction extracted from the brains of 3xTg and Thy1-ApoE4/C/EBP $\beta$  Tg mice. Scale bar 100 nm.

C. Western blotting assay of insoluble A $\beta$  fraction extracted from the brains of 3xTg and Thy1-ApoE4/C/EBP $\beta$  Tg mice.

D. ELISA assay of soluble A $\beta$ 40 and A $\beta$ 42 levels in the brains of 3xTg and Thy1-ApoE4/C/EBP $\beta$  Tg mice at different ages. (n = 3, \* $p$  < 0.05, \*\* $p$  < 0.01).

E. ELISA assay of insoluble A $\beta$ 40 and A $\beta$ 42 levels in the brains of 3xTg and Thy1-ApoE4/C/EBP $\beta$  Tg mice at different ages. (n = 3, \* $p$  < 0.05, \*\* $p$  < 0.01, \*\*\* $p$  < 0.001).

F-H. Representative immunostaining images of AT8 (F), TUNEL (G), AEP and Tau N368 (H) in primary rat neurons treated with A $\beta$  aggregates (2  $\mu$ g) extracted from the brains of 3xTg and Thy1-ApoE4/C/EBP $\beta$  Tg mice. Scale bar 20  $\mu$ m.

Supplementary Fig. 5

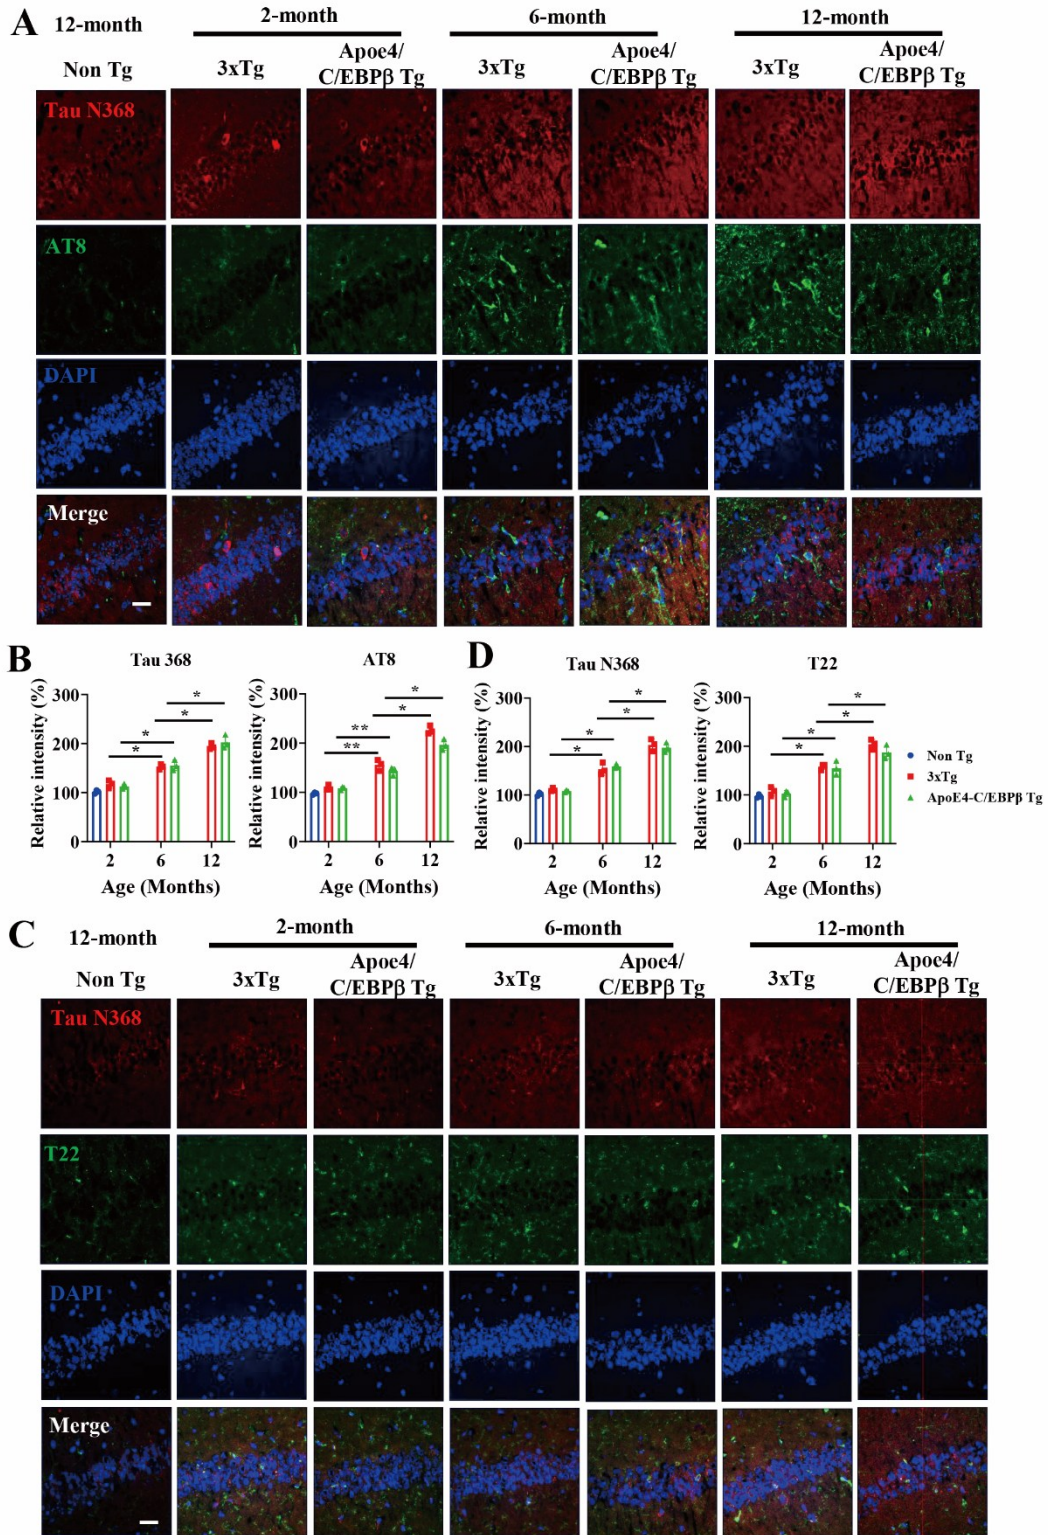

**Supplementary Fig. 5 Age-dependent increases of Tau pathology in 3xTg and Thy1-ApoE4/C/EBP $\beta$  Tg mice.**

A. Co-staining of Tau N368 and AT8 in the hippocampus of 3xTg and Thy1-ApoE4/C/EBP $\beta$  Tg mice at 2-, 6- and 12-month of age. Scale bar 20  $\mu$ m.

B. Quantification of AT8 and Tau N368 fluorescent signals in (A). (n = 3, \* $p$  < 0.05, \*\* $p$  < 0.01).

C. Co-staining of Tau N368 and AT22 in the hippocampus of 3xTg and Thy1-ApoE4/C/EBP $\beta$  Tg mice at 2-, 6- and 12-month of age. Scale bar 20  $\mu$ m

D. Quantification of T22 and Tau N368 fluorescent signals in (C). (n = 3, \* $p$  < 0.05).

## Supplementary Fig. 6

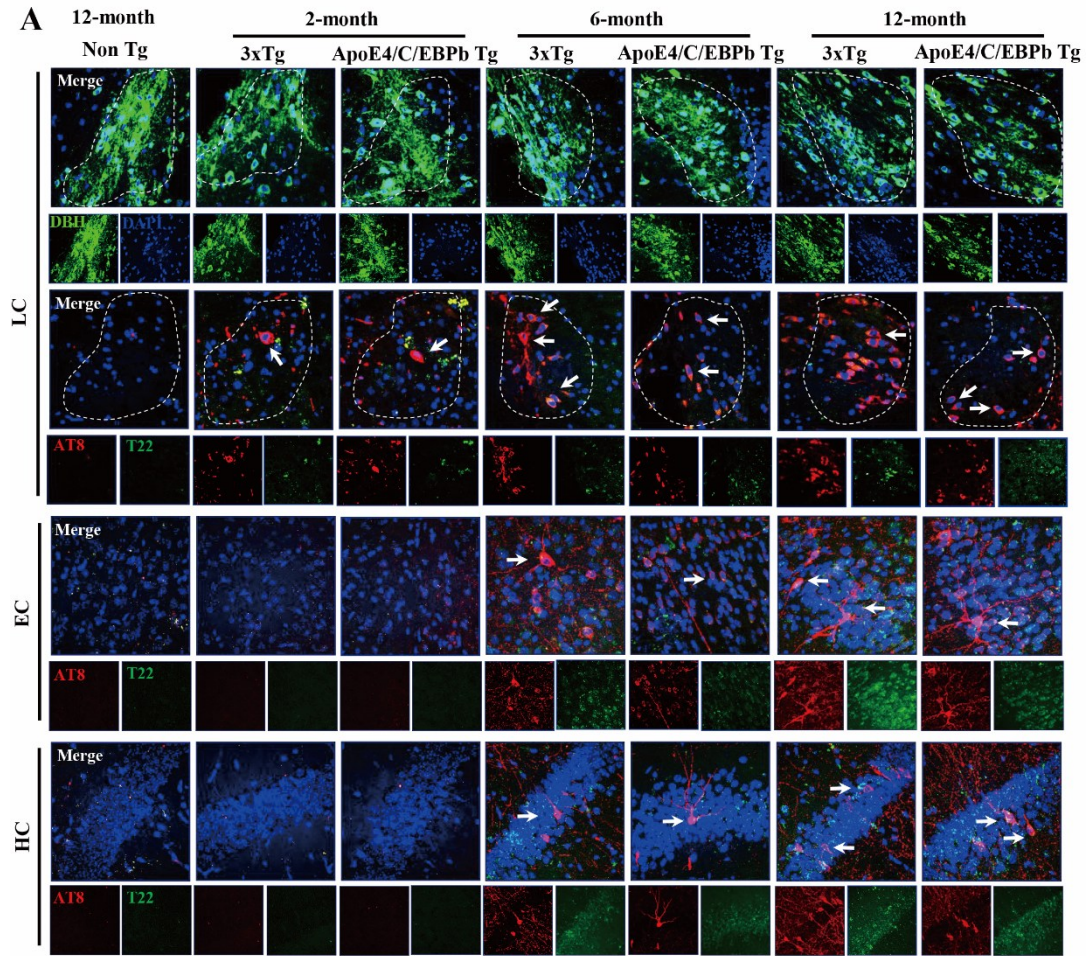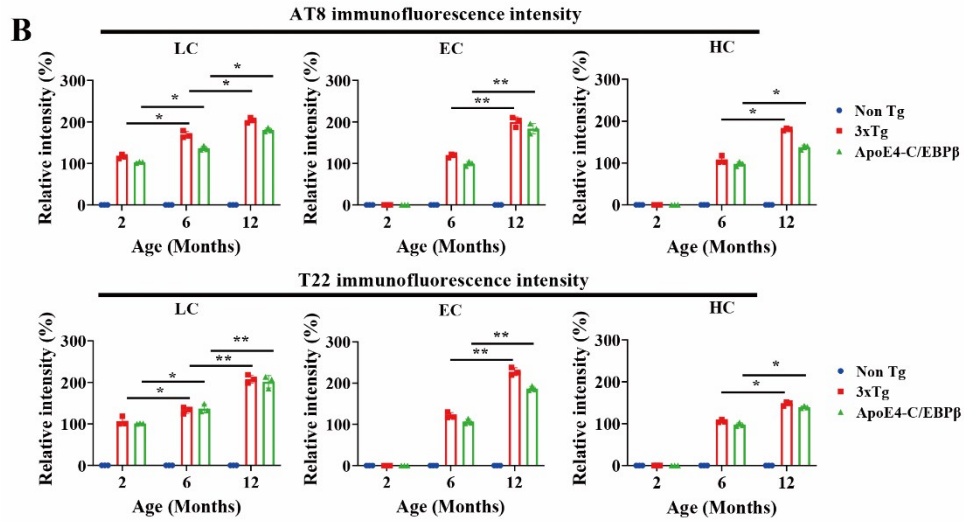

**Supplementary Fig. 6 Tau spreading in 3xTg and Thy1-ApoE4/C/EBP $\beta$  Tg mice**

A. Representative AT8 and T22 immunostaining images in LC, EC and HC of 3xTg and Thy1-ApoE4/C/EBP $\beta$  Tg mice at 2-, 6- and 12-month of age. LC, Locus coeruleus; EC, entorhinal cortex; HC, hippocampus.

B. Quantification of AT8 and T22 fluorescent signals in LC, EC and HC. (n = 3, \* $p$  < 0.05, \*\* $p$  < 0.01)

# Supplementary Fig. 7

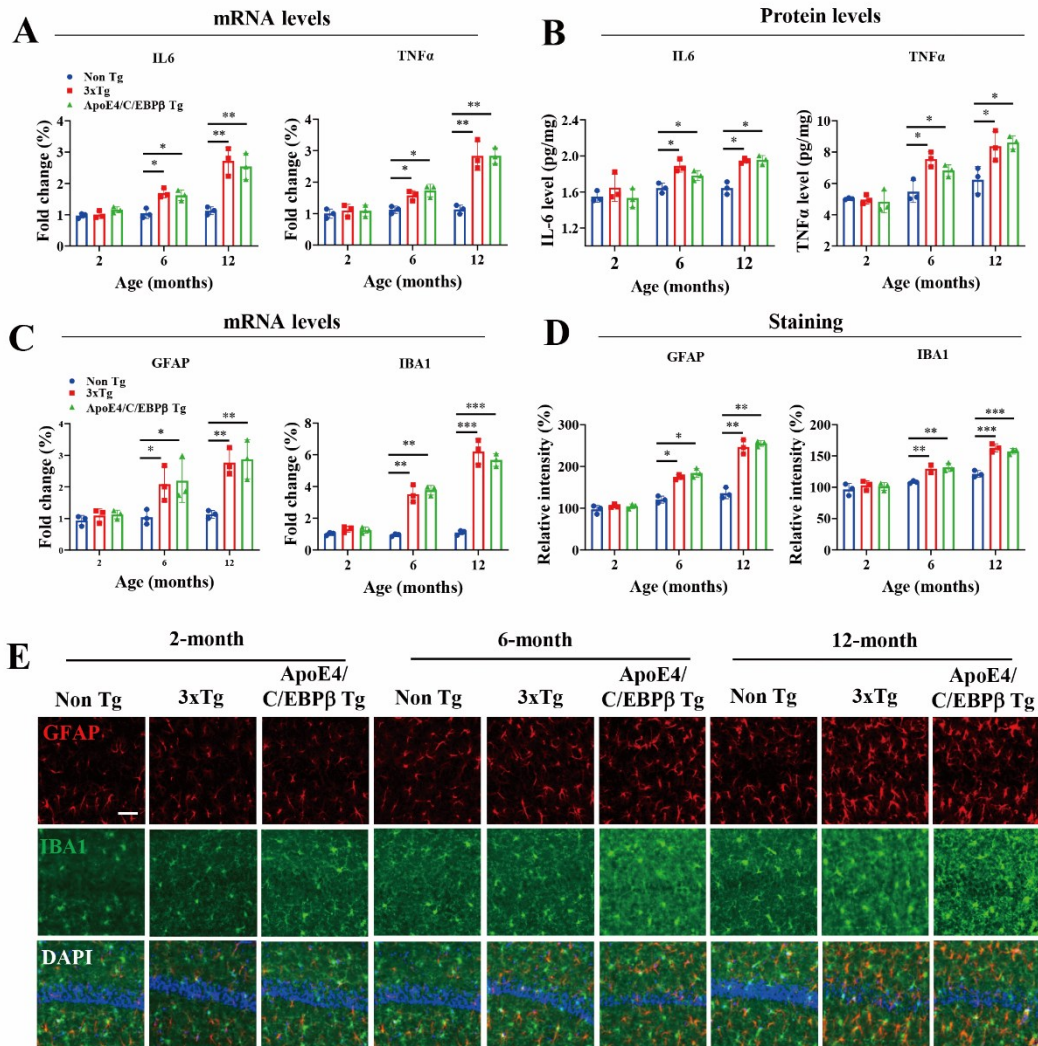

**Supplementary Fig. 7 Neuroinflammation in 3xTg and Thy1-ApoE4/C/EBP $\beta$  Tg mice**

A. The mRNA expression of IL-6 (left panel) and TNF- $\alpha$  (right panel) in the brain of 3xTg and Thy1-ApoE4/C/EBP $\beta$  Tg mice at 2-, 6- and 12-month of age. (n = 3, \* $p$  < 0.05, \*\* $p$  < 0.01, compared with Non Tg).

B. ELISA analysis of mouse IL-6 (left panel) and TNF- $\alpha$  (right panel) in the brain tissues of 3xTg and Thy1-ApoE4/C/EBP $\beta$  Tg mice at 2-, 6- and 12-month of age. (n = 3, \* $p$  < 0.05, compared with Non Tg).

C. The mRNA expression of GFAP (left panel) and Iba1 (right panel) in the brains of 3xTg and Thy1-ApoE4/C/EBP $\beta$  Tg mice at 2-, 6- and 12-month of age. (n = 3, \* $p$  < 0.05, \*\* $p$  < 0.01, \*\*\* $p$  < 0.01, compared with Non Tg).

D. Relative quantification of GFAP (left panel) and Iba1 (right panel) fluorescence intensity in (E). (n = 3, \* $p$  < 0.05, compared with vehicle).

E. Immunostaining of GFAP and Iba1 in hippocampus of 3xTg and Thy1-ApoE4/C/EBP $\beta$  Tg mice at 2-, 6- and 12-month age. Scale bar, 100  $\mu$ m.

# Supplementary Fig. 8

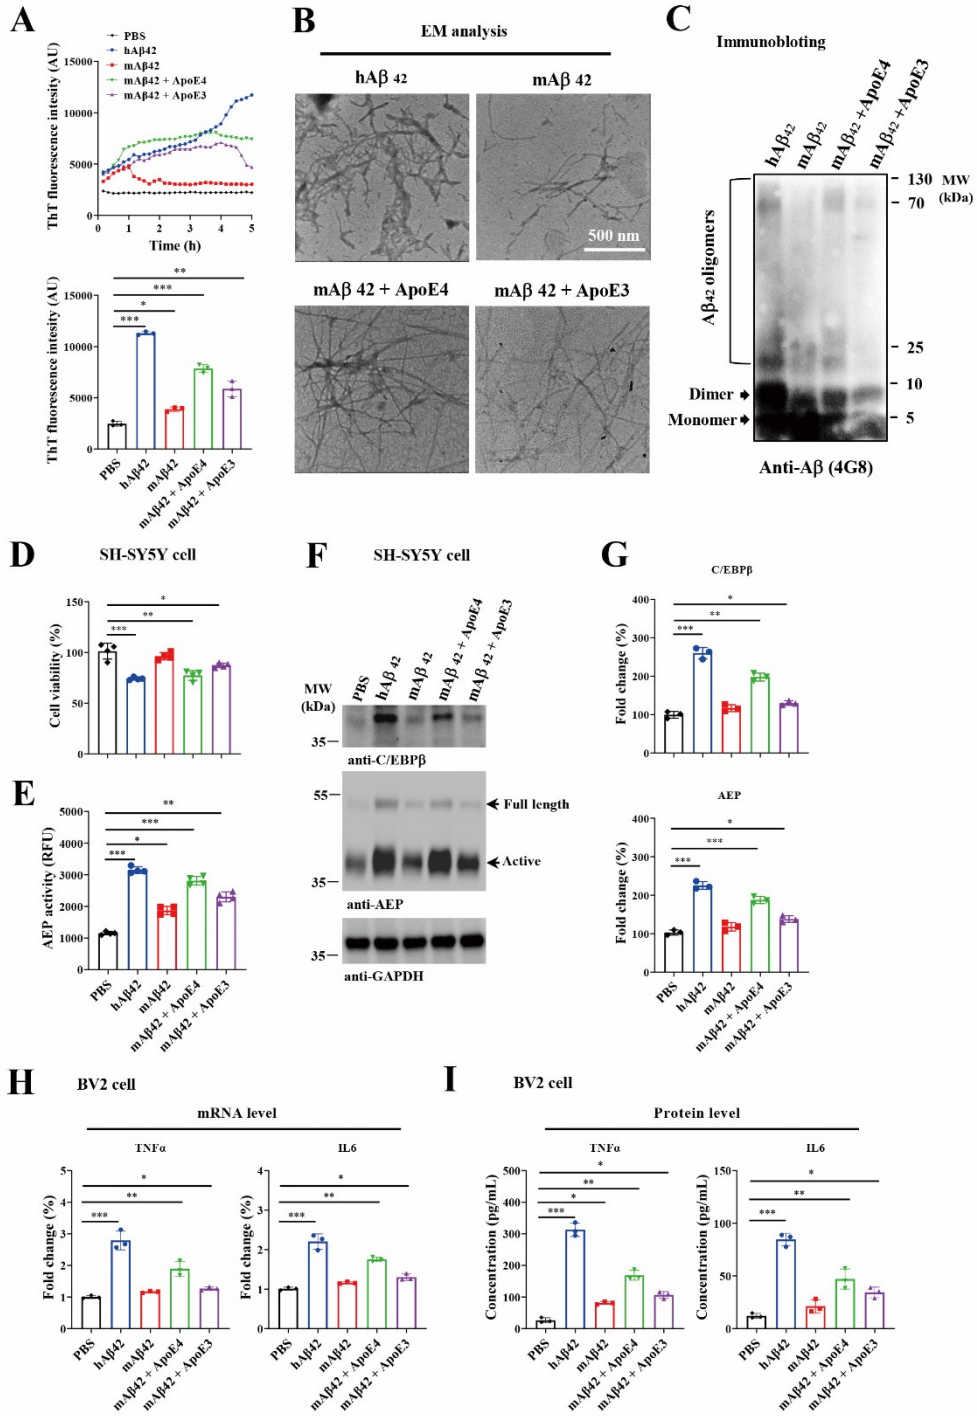



**Supplementary Fig. 8 ApoE4 promotes mouse A $\beta$  aggregation and neurotoxicity**

A. Representative curves of the Thioflavin T (ThT) fluorescence assays following ApoE4 and mouse A $\beta$ 42 (mA $\beta$ 42) co-incubation. Human A $\beta$ 42 (hA $\beta$ 42), mA $\beta$ 42 alone and ApoE3 / mA $\beta$ 42 co-incubation were taken as controls. The ThT assay was independently repeated three times.

B. TEM analysis of ApoE4 and mA $\beta$ 42 incubation at 37 °C for 96 h. Similar results were observed in four independent experiments. Scale bar, 500 nm.

C. Immunoblotting analysis showing ApoE4-mediated enhancement of mA $\beta$ 42 oligomer formation *in vitro*.

D and E. Effects of ApoE4 / mA $\beta$ 42 incubation on cell viability (D) and AEP activity in SH-SY5Y cells. (n = 3, \* $p$  < 0.05, \*\* $p$  < 0.01, \*\*\* $p$  < 0.01, compared with PBS).

F. Immunoblotting analysis showing ApoE4 / mA $\beta$ 42 incubation activate C/EBP $\beta$  and AEP expression in SH-SY5Y cells.

G. Relative quantification of protein expression in (F). (n = 3, \* $p$  < 0.05, \*\* $p$  < 0.01, \*\*\* $p$  < 0.001, compared with PBS).

H and I. Effects of ApoE4 / mA $\beta$ 42 incubation on TNF $\alpha$  and IL-6 at mRNA (H) and protein (I) levels in microglial BV2 cells. (n = 3, \* $p$  < 0.05, \*\* $p$  < 0.01, \*\*\* $p$  < 0.001, compared with PBS).
